# Supplementary material for: Amplification of future energy demand growth due to climate change
Source: Springer Nature journal article supplement (doi:10.1038/s41467-019-10399-3), 2019-06-24
Supplement: 41467_2019_10399_MOESM1_ESM.pdf [file 41467_2019_10399_MOESM1_ESM.pdf]

1 **Supplementary Information for**

2

3 **Amplification of Future Energy Demand Growth due to Climate Change**

4 van Ruijven, et al., Nature Communications, 2019

5

6

## 7 **Supplementary Note 1: Sector Definitions**

8 Our definition of economic sectors matches the definition used by the International Energy  
9 Agency, and it reflects the final consumption of energy by final sectoral users.

- 10 • Agriculture includes the sectors ISIC 01–03. Agriculture/forestry includes deliveries to users  
11 classified as agriculture, hunting and forestry by the ISIC, and energy consumed by such users  
12 whether for traction (excluding agricultural highway use), power or heating (agricultural and  
13 domestic).
- 14 • The commercial sector includes the sectors ISIC 33; 36–39; 45–47; 53; 55; 56; 58–66; 68–75;  
15 77–82; 84 (excl. 8422); 85–88; 90–96; 99.
- 16 • Industry includes the sectors ISIC 241, 2431: Iron and steel; 20–21: Chemical and  
17 petrochemicals excl. petrochemical feedstocks; 242, 2432: Non-ferrous metal basic industries;  
18 23: Non-metallic minerals; 29–30: Transport equipment; 25–28: Machinery, fabricated metal  
19 products, machinery and equipment other than transport equipment; 07, 08, 099: Mining (excl.  
20 fuels) and quarrying; 10–12: food and tobacco; 17–18: Paper, pulp and print; 16: Wood and  
21 wood products (other than pulp and paper); 41–43: Construction; 13–15: Textile and leather;  
22 22, 31–32: Manufacturing n.e.c.
- 23 • The residential sector includes the sectors ISIC 97–98. Heat pumps operated within the  
24 residential sector where heat is not sold are not considered a transformation process and are  
25 included here Transportation ISIC 49–51: Consumption in transport covers all transport  
26 activity (in mobile engines) regardless of the economic sector to which it contributes.

27

## 28 **Supplementary Note 2: Income grouping of countries**

29 Fig. 5 and Fig. S5 use income grouping of countries into the World Bank income classes of  
30 low income countries, lower middle income countries, upper middle income countries and high  
31 income countries. The most recent World Bank definitions of these groups are in year 2014 Atlas  
32 method USD GDP per capita levels of:

- 33 • <\$1045 low income
- 34 • <\$4125 lower middle income
- 35 • <\$12735 upper middle income

36 The GDP projections for the SSPs (from the OECD) are provided in year 2005 USD, also using  
37 the Atlas method. However, converting these cutoff levels from year 2014 to year 2005 dollars is  
38 not straightforward given the definition of the Atlas method. An estimated adjustment based on  
39 which countries are around the cutoff levels of each category lead to the following definition in  
40 year 2005 dollars:

- 41 • <\$2000 low income
- 42 • <\$6000 lower middle income
- 43 • <\$15000 upper middle income

44 In Fig. 5, we use lower middle income countries as proxy for high challenges to adaptation,  
45 upper middle income countries as proxy for moderate challenges to adaptation and high income  
46 countries as proxy for low challenges to adaptation.

47 **Supplementary Note 3: Reconciling Bottom-Up and Top-Down Estimates of the Impact of**  
 48 **Climate Change on Electricity Demand**

49 The error-correction model employed by De Cian and Sue Wing (2019) - hereafter DCSW - is a  
 50 reparameterization of the lagged dependent variable specification

51

$$52 \quad q_{s,i,t} = \alpha_{s,i} + \Sigma_z \left\{ \begin{array}{l} \lambda_{s,z}(q_{s,i,t-1} * D_{z(i)}) + \beta_{s,Y,z}(y_{i,t} * D_{z(i)}) + \\ \beta_{s,L,z}(L_{i,t} * D_{z(i)}) + \beta_{s,H,z}(H_{i,t} * D_{z(i)}) \end{array} \right\} + \varepsilon_{s,i,t} \quad (S1)$$

53

54 where  $s$ ,  $i$ ,  $z$  and  $t$  index sectors, countries, climatic zones and years, respectively, and  $D$  denotes  
 55 a dummy variable that assigns countries to a temperate or tropical climate zone,  $y$  and  $q$  denote  
 56 the logarithm of per capita GDP and sectoral consumption of the type of fuel under  
 57 consideration, and  $L$  and  $H$  denote the annual sum of days with population-weighted low  
 58 temperatures (daily average  $< 12.5$  °C) and high temperatures (daily average  $> 27.5$  °C) over  
 59 each year. The estimated parameter  $\alpha_i$  is a country fixed effect, and  $\beta_Y$ ,  $\beta_L$  and  $\beta_H$  are the  
 60 coefficients of interest. Our projections are based on the estimates in Table 2, which are the long-  
 61 run responses  $\beta_{s,Y,z}/(1 - \lambda_{s,z})$ ,  $\beta_{s,L,z}/(1 - \lambda_{s,z})$  and  $\beta_{s,H,z}/(1 - \lambda_{s,z})$ .

62

63 For days with mild weather ( $12.5$  °C  $< T < 27.5$  °C),  $C$  and  $H$  are both zero and  $q_{s,i} = \alpha_{s,i} +$   
 64  $\beta_{s,Y,z}(y_{i,t} * D_{z(i)})$  meaning that a country's demand remains at its conditional mean per capita  
 65 level determined by idiosyncratic factors and income. (DCSW also include a vector of fuel prices  
 66 as controls but these elasticities were estimated with precision, and were frequently dropped  
 67 from the regressions because of gaps in the relevant series. Where  $\beta_L$  and  $\beta_H$  are identified, the

68 result is a piecewise nonlinear spline that traces out a piecewise-linear, generally U-shaped,  
69 response (cf DCSW, Fig. 1).

70

71 Recent climate econometric studies of electric power demand use large samples of observed load  
72 and temperature at fine spatial- and temporal scales to estimate coefficients on multiple bins of  
73 temperature that trace out a nonlinear demand response. Auffhammer et al (2017)<sup>46</sup> - hereafter  
74 ABH - show that the latter can be well approximated by linear schedules for increasing high  
75 temperatures and decreasing low temperatures, outside of an intermediate moderate temperature  
76 zone. This point is apparent from visual inspection of ABH Fig. 1 (or as well in Wenz et al,  
77 2017: Figs. 2 and 3).

78

79 We exploit this insight to approximate the empirical model underlying ABH Fig. 1 using the  
80 local degree-day specification

81

$$\begin{aligned} 82 \quad V_{\ell,d} = & \gamma_{\ell} + \delta_{L,\ell} \max(12.5 - T_{\ell,d}, 0) + \delta_{C,\ell} \max(15 - T_{\ell,d}, 0) \\ 83 \quad & + \delta_{W,\ell} \max(T_{\ell,d} - 18, 0) + \delta_{H,\ell} \max(T_{\ell,d} - 21, 0) + \vartheta_{\ell,d} \quad (S2) \end{aligned}$$

84

85 where now  $\ell(i)$  indexes fine geographic scale locations within the USA,  $d(t)$  indexes the days  
86 within each year,  $V$  and  $\gamma$  denote the location's observed and conditional mean hourly energy  
87 demand, the subscripts C and W indicate "cool" (as opposed to cold) days with intermediate low  
88 temperatures (daily average  $12.5^{\circ}\text{C} < T < 16^{\circ}\text{C}$ ) and "warm" (as opposed to hot) days with  
89 intermediate high temperatures (daily average  $21^{\circ}\text{C} < T < 27.5^{\circ}\text{C}$ ). The parameters of interest

90 are the local load ramps with temperature for cold, cool, warm and hot days,  $\delta_L$ ,  $\delta_C$ ,  $\delta_W$  and  
 91  $\delta_H$ , which can be backed out from the coordinates of points on the average load-temperature  
 92 responses in the figure (see Supplementary Table 6).

93

94 We note that, due to the insurmountable limitations of IEA data, DCSW do not find exposures in  
 95 the ranges  $12.5^\circ\text{C} < T < 15^\circ\text{C}$ ,  $15^\circ\text{C} < T < 17.5^\circ\text{C}$ ,  $20^\circ\text{C} < T < 22.5^\circ\text{C}$ ,  $22.5^\circ\text{C} < T < 25^\circ\text{C}$   
 96 or  $25^\circ\text{C} < T < 27.5^\circ\text{C}$  (or the collapsed ranges  $12.5^\circ\text{C} < T < 17.5^\circ\text{C}$ ,  $20^\circ\text{C} < T < 27.5^\circ\text{C}$ ) to  
 97 have statistically significant effects. Notwithstanding this, the local and geographically averaged  
 98 demand responses can be reconciled. ABH do not distinguish short- and long-run effects,  
 99 accordingly, for comparability we utilize the static responses reported in DCSW Table 11. Let  $N$   
 100 denote local population. If the latter parameters absorb the effects on demand of moderate as  
 101 well as extreme temperatures, then for cold and hot days

102

$$\begin{aligned} & \bar{\beta}_L \\ & = \mathbb{E} \left\{ \frac{\partial \log[\Sigma_\ell \Sigma_d (\gamma_\ell + \delta_{L,\ell} \max(12.5 - T_{\ell,d}, 0) + \delta_{C,\ell} \max(15 - T_{\ell,d}, 0)) / \Sigma_\ell N_{\ell,t}]}{\partial [\Sigma_\ell (N_{\ell,t} * \Sigma_d (T_{\ell,d(t)} < 12.5)) / \Sigma_\ell N_{\ell,t}]} \right\} \end{aligned} \quad (\text{S3a})$$

$$\begin{aligned} & \bar{\beta}_H \\ & = \mathbb{E} \left\{ \frac{\partial \log[\Sigma_\ell \Sigma_d (\gamma_\ell + \delta_{W,\ell} \max(T_{\ell,d} - 18, 0) + \delta_{H,\ell} \max(T_{\ell,d} - 21, 0)) / \Sigma_\ell N_{\ell,t}]}{\partial [\Sigma_\ell (N_{\ell,t} * \Sigma_d (T_{\ell,d(t)} > 27.5)) / \Sigma_\ell N_{\ell,t}]} \right\} \end{aligned} \quad (\text{S3b})$$

103

104 Whereas if geographically averaged demand responses capture only the effects of temperature  
 105 extremes, they underestimate the weather responsiveness of demand

106

$$\underline{\beta}_L = \mathbb{E} \left\{ \frac{\partial \log[\Sigma_\ell \Sigma_d (\gamma_\ell + \delta_{L,\ell} \max(12.5 - T_{\ell,d}, 0)) / \Sigma_\ell N_{\ell,t}]}{\partial [\Sigma_\ell (N_{\ell,t} * \Sigma_d (T_{\ell,d(t)} < 12.5)) / \Sigma_\ell N_{\ell,t}]} \right\} \quad (\text{S4a})$$

$$\underline{\beta}_H = \mathbb{E} \left\{ \frac{\partial \log[\Sigma_\ell \Sigma_d (\gamma_\ell + \delta_{H,\ell} \max(T_{\ell,d} - 27.5, 0)) / \Sigma_\ell N_{\ell,t}]}{\partial [\Sigma_\ell (N_{\ell,t} * \Sigma_d (T_{\ell,d(t)} > 27.5)) / \Sigma_\ell N_{\ell,t}]} \right\} \quad (\text{S4b})$$

107

108 Eqs. (S3) and (S4) elucidate that local weather-insensitive energy consumption, the sub-national  
109 distribution of population and the distribution average daily temperatures above and below  
110 DCSW's hot and cold cutoffs potentially drive a wedge between the local and geographically  
111 averaged estimates.

112

113 To operationalize eqs. (S3) and (S4), we collect data for the period 2005-2018 on annual county  
114 populations from the US Bureau of Economic Analysis, as well as gridded historical hourly 2m  
115 air temperature from the North American Land Data Assimilation System (NLDAS) forcing file  
116 A, which are mapped to 487 counties in PJM and 194 counties in ERCOT. Weather-insensitive  
117 demand corresponding to the omitted  $15^\circ\text{C} < T < 18^\circ\text{C}$  interval,  $\gamma$ , is not observed. We  
118 approximate it by the hourly systemwide demand for days with average temperature  $15^\circ\text{C} < T <$   
119  $18^\circ\text{C}$  over the period 2006-2014 covered by ABH's dataset: 30,036 MW for ERCOT and 67,022  
120 MW for PJM. Because of the prevalence of moderate temperature days, the omitted interval in  
121 ABH's response is associated with a large fraction of demand, leaving weather-sensitive demand  
122 to account for just 17.5% and 11.8% of ERCOT and PJM total annual total, respectively.

123

124 Supplementary Table 7 illustrates how DCSW’s elasticities compare with (S3) and (S4). To  
 125 maximize comparability, we aggregate DCSW’s temperature responses for the residential,  
 126 commercial and industrial sectors. At least in the US context, the reconciled temperature semi-  
 127 elasticities built up from heterogeneous “bottom-up” estimates for PJM and ERCOT are of the  
 128 same overall magnitude as their counterpart “top-down” semi-elasticities identified from  
 129 variation across temperate countries. However, the concern is that DCSW’s weighted average  
 130 response to cold days is insignificant, while the response to hot days exceeds the estimates  
 131 implied by ABH.

132

133 The key question is the magnitude of bias this divergence introduces into projections of the  
 134 impact of warming on energy demand. From ABH’s levels specification (S2), given vectors of  
 135 daily temperatures at multiple locations under current and future climates,  $\bar{T}_{\ell,d}$  and  $\bar{T}'_{\ell,d}$ , the  
 136 bottom-up impact is given by the fractional increase in annual electricity demand

137

$$\begin{aligned}
 & I_{\ell} \\
 &= \frac{8760 * \gamma_{\ell} + \Sigma_d 24 * \left( \delta_{L,\ell} \max(12.5 - \bar{T}'_{\ell,d}, 0) + \delta_{C,\ell} \max(15 - \bar{T}'_{\ell,d}, 0) + \right. \\
 & \quad \left. \delta_{W,\ell} \max(\bar{T}'_{\ell,d} - 18, 0) + \delta_{H,\ell} \max(\bar{T}'_{\ell,d} - 21, 0) \right)}{8760 * \gamma_{\ell} + \Sigma_d 24 * \left( \delta_{L,\ell} \max(12.5 - \bar{T}_{\ell,d}, 0) + \delta_{C,\ell} \max(15 - \bar{T}_{\ell,d}, 0) + \right. \\
 & \quad \left. \delta_{W,\ell} \max(\bar{T}_{\ell,d} - 18, 0) + \delta_{H,\ell} \max(\bar{T}_{\ell,d} - 21, 0) \right)} \quad (S5)
 \end{aligned}$$

138

139 Note how in both the numerator and denominator of (S5), total annual demand is partitioned into  
 140 weather-insensitive and weather-responsive components, respectively. To undertake an apples-  
 141 to-apples comparison of the impacts of ABH’s total demand in levels against DCSW’s sectoral



142 demand in logarithms, the two sets of projections should be constructed with similar conditional  
 143 means. DCSW's conditional mean per capita load for the entire United States diverges from that  
 144 for ERCOT and PJM. To reconcile the two sets of estimates following the partitioning strategy in  
 145 (S5), two pieces of ancillary information are necessary to transform sectoral semi-elasticities into  
 146 demand in levels: each sector's fraction of demand,  $\sigma_s$  (Supplementary Table 7, column 4), and  
 147 the weather-responsive fraction of total demand,  $\omega$ . The result is the comparable impact metric is

148  
 149  $\tilde{I}_\ell$

$$\begin{aligned}
 150 \quad &= \frac{8760 * \gamma_\ell * \langle 1 + \frac{\omega_\ell}{1 - \omega_\ell} \left[ \Sigma_s \sigma_s * \exp \left\{ \beta_{s,L} \Sigma_d \left( 1 * (\bar{T}'_{\ell,d} < 12.5) \right) + \beta_{s,H} \Sigma_d \left( 1 * (\bar{T}'_{\ell,d} > 27.5) \right) \right\} \right] \rangle}{8760 * \gamma_\ell * \langle 1 + \frac{\omega_\ell}{1 - \omega_\ell} \left[ \Sigma_s \sigma_s * \exp \left\{ \beta_{s,L} \Sigma_d \left( 1 * (\bar{T}_{\ell,d} < 12.5) \right) + \beta_{s,H} \Sigma_d \left( 1 * (\bar{T}_{\ell,d} > 27.5) \right) \right\} \right] \rangle} \\
 &= \frac{(1 - \omega_\ell) + \omega_\ell \left[ \Sigma_s \sigma_s * \exp \left\{ \beta_{s,L} \Sigma_d \left( 1 * (\bar{T}'_{\ell,d} < 12.5) \right) + \beta_{s,H} \Sigma_d \left( 1 * (\bar{T}'_{\ell,d} > 27.5) \right) \right\} \right]}{(1 - \omega_\ell) + \omega_\ell \left[ \Sigma_s \sigma_s * \exp \left\{ \beta_{s,L} \Sigma_d \left( 1 * (\bar{T}_{\ell,d} < 12.5) \right) + \beta_{s,H} \Sigma_d \left( 1 * (\bar{T}_{\ell,d} > 27.5) \right) \right\} \right]} \quad (S6)
 \end{aligned}$$

151

152 For counties in the ERCOT and PJM territories, we extract daily average temperatures from  
 153 NASA NEX GDDP dataset's downscaled and bias corrected 0.25° gridded maximum and  
 154 minimum daily temperatures simulated by CMIP5 runs of the CCSM4 climate model. To  
 155 calculate (S5) and (S6), we compare average daily temperatures for the late-century 2090-99  
 156 ( $\bar{T}'_{\ell,d}$ ) to ABH's 2006-15 study period ( $\bar{T}_{\ell,d}$ ).

157

158 The results, shown in Supplementary Figure 10, are reasonable, with eq. (S5) projecting  
 159 increases in total energy demand of 11.2% for ERCOT and 7.7% for PJM, in excellent  
 160 agreement with ABH: Table 1. By comparison, aggregated impacts based on DCSW's estimates

161 that are significant at the 15% level were found to be larger for ERCOT and smaller for PJM,  
162 and to exhibit greater variance. The scatterplots indicate an upward bias relative to ABH's  
163 transformed elasticities in hot regions (ERCOT), consistent with Table S8. The pattern of  
164 significance of DCSW's estimates implies that as locations' temperature distributions shift  
165 rightward, their electricity demand responds more elastically to the positive effect of increases  
166 hot days, but responds less elastically or completely inelastically to the negative impact of  
167 reductions in cold days.

168  
169 These findings are encouraging, suggesting that, even at fine spatial scales, DCSW's semi-  
170 elasticities form a credible basis for projecting the impacts of climate change on energy demand.  
171 Although such projections require ancillary data to pin down local conditional means, and even  
172 then do not precisely replicate the empirical responses and patterns of impacts generated by more  
173 sophisticated high temporal frequency/fine spatial scale econometric models, the fact that a  
174 simple, global model estimated on data that are incommensurate and far coarser is able to match  
175 these projections' broad patterns attests to the validity of our approach.

176  
177 Still, our analysis highlights the caveat that the local conditional mean energy consumption and  
178 the fraction of weather-sensitive demand are crucial parameters that determine the magnitude of  
179 impact. However, these are not observed for the various fuel  $\times$  sector combinations in grid cells  
180 across the world. Our projection methodology is based on the assumption that in the long run  
181  $\omega \rightarrow 1$ , so that, employing the long-run elasticities in Table 1, eq. (S6) collapses to the sectoral  
182 impact metric

183

$$184 \quad \tilde{I}_{s,\ell} = \exp \left\{ \begin{aligned} & \left( \beta_{s,L}/(1 - \lambda_s) * \left( \Sigma_d \left( 1 * (\bar{T}'_{\ell,d} < 12.5) \right) - \Sigma_d \left( 1 * (\bar{T}' < 12.5) \right) \right) + \right. \\ & \left. \left( \beta_{s,H}/(1 - \lambda_s) * \left( \Sigma_d \left( 1 * (\bar{T}'_{\ell,d} > 27.5) \right) - \Sigma_d \left( 1 * (\bar{T}_{\ell,d} > 27.5) \right) \right) \right) \right\} \quad (S7) \end{aligned} \right.$$

185

186 which we use to quantify the fractional increase in 2050 energy demand due to climate change.

187 This expression likely overestimates the response of demand to warming, but there is a pervasive

188 lack of information on which to assess the magnitude and geographic distribution of the biases to

189 which it may be subject. For this reason, it is prudent to interpret the impacts in the text as worst-

190 case projections especially in tropical and subtropical regions, conditional on the extent of

191 warming.

192

193

194

195 **Supplementary Figure 1**

196 Number of people exposed to changes in energy demand by sector, energy carrier and total for  
197 the mean and all 21 CMIP5 models by 2050 under RCP8.5 and SSP5

198

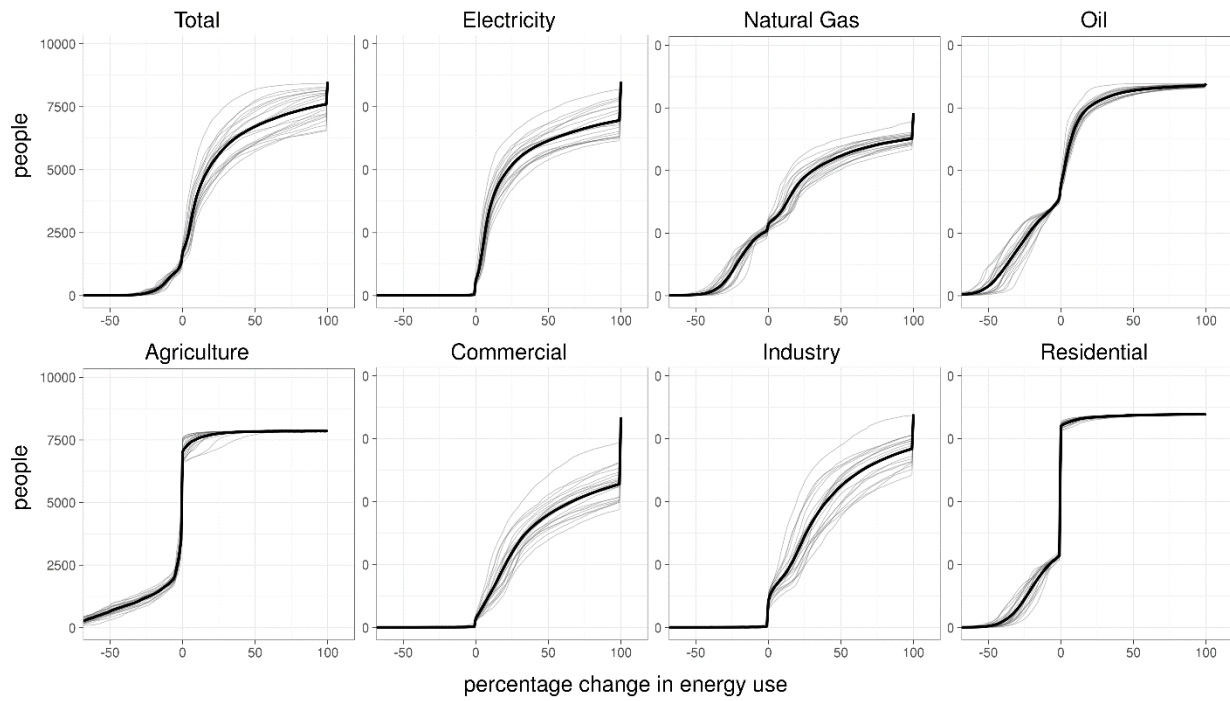

199

200

201

202 **Supplementary Figure 2**

203 Number of people exposed to changes in energy demand by sector, energy carrier and total for  
204 the mean and all 21 CMIP5 models by 2050 under RCP4.5 and SSP5

205

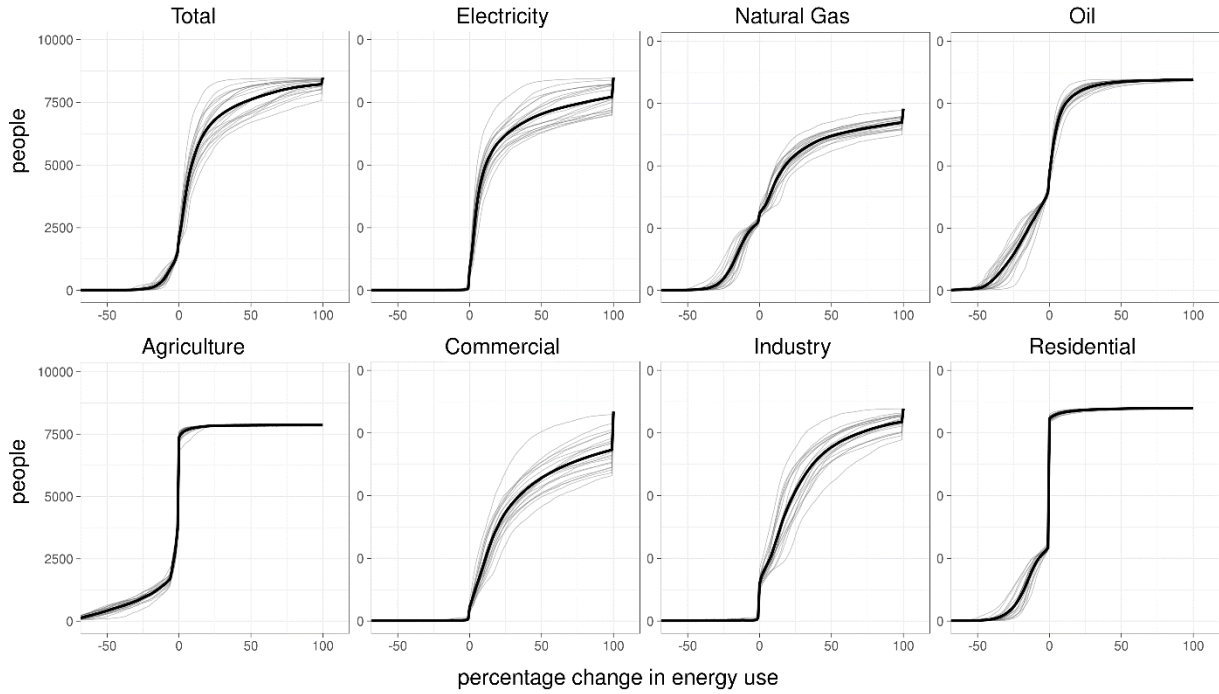

206

207

208

209 **Supplementary Figure 3**

210 Cumulative distribution of the number of people exposed to percentage change in climate-related  
211 final energy demand by country GDP per capita. Lines indicate the multi-model mean (thick  
212 lines) and all individual 21 CMIP5 models (thin lines) by 2050 under RCP4.5. Present day  
213 World Bank definitions for GDP per capita were used to classify countries in income categories,  
214 which we linked to adaptation challenges.

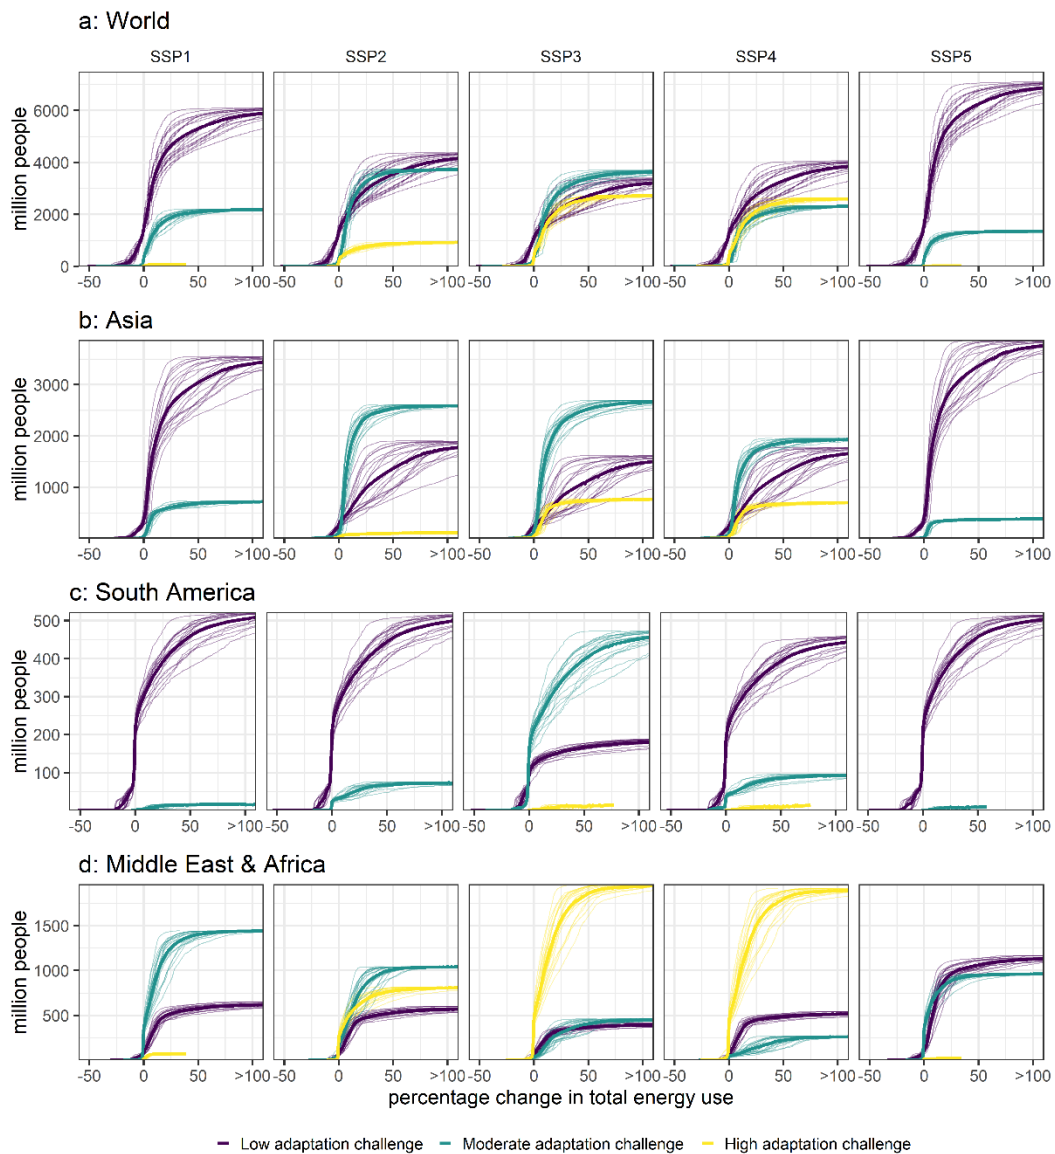

215

216 **Supplementary Figure 4**

217 Comparison between base-year data used in our analysis (red dots) and in six Integrated  
218 Assessment Model (box and whisker) realizations of final energy demand by sector (residential  
219 and services (together in buildings), industry) and energy carriers (electricity, natural gas and  
220 petroleum products) by 2010 for the World. The bottom panels indicate that our study has a  
221 different definition for liquids than the IAMs.

222

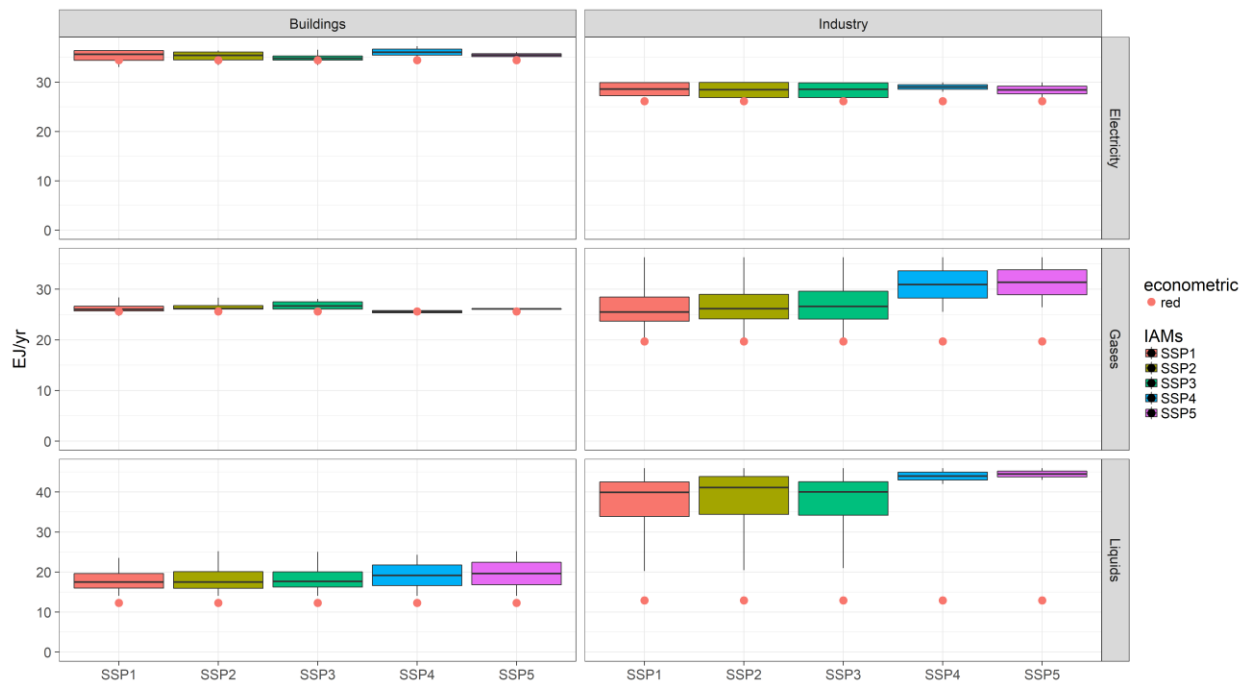

223

224

225

226

227 **Supplementary Figure 5**

228 Comparison between econometric model projections (red dots) and in six Integrated Assessment  
229 Model (box and whisker) realizations of final energy demand by sector (residential and services  
230 (together in buildings) and industry) and energy carrier (electricity, natural gas and petroleum  
231 products) by 2050 for the World under five SSPs.

232

233

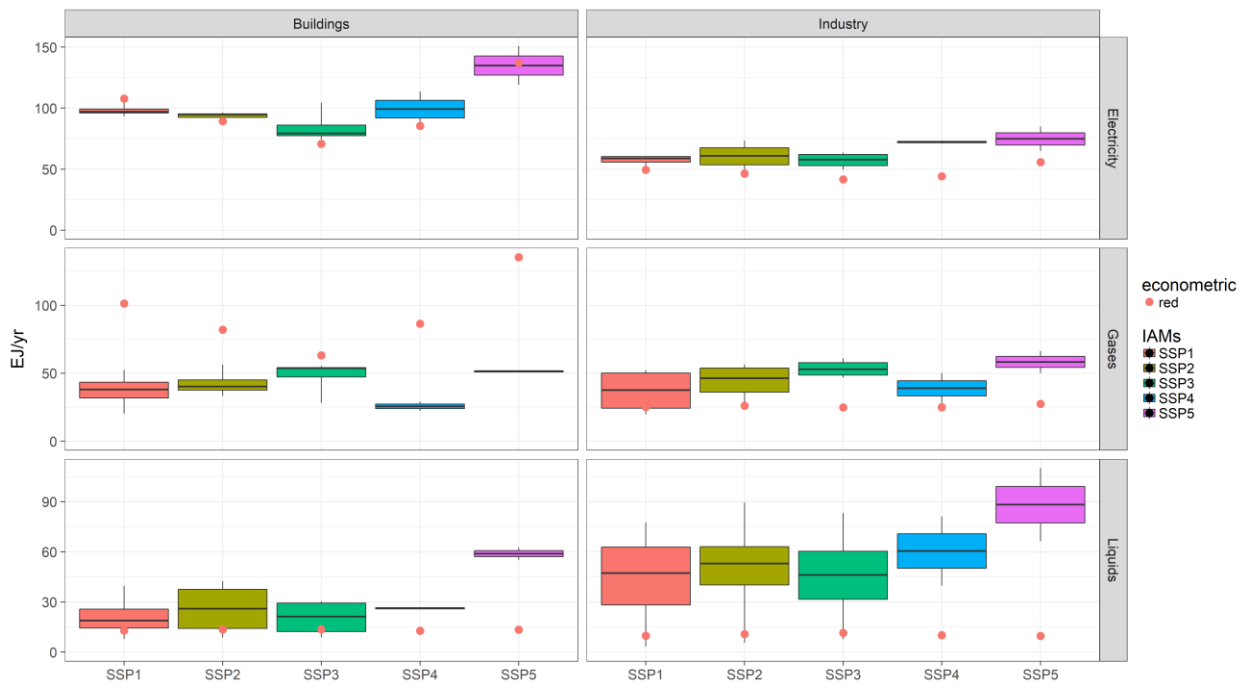

234

235



236 **Supplementary Figure 6**

237 Changes in the days with mean temperatures above 27.5°C and below 12.5°C under RCP4.5 for  
238 21 ESMs and the mean. Contrary to RCP8.5, which is shown in the main text, this lower climate  
239 change scenarios leads to a smaller increase in the number of hot days and a minor decrease in  
240 the number of cold days.

241

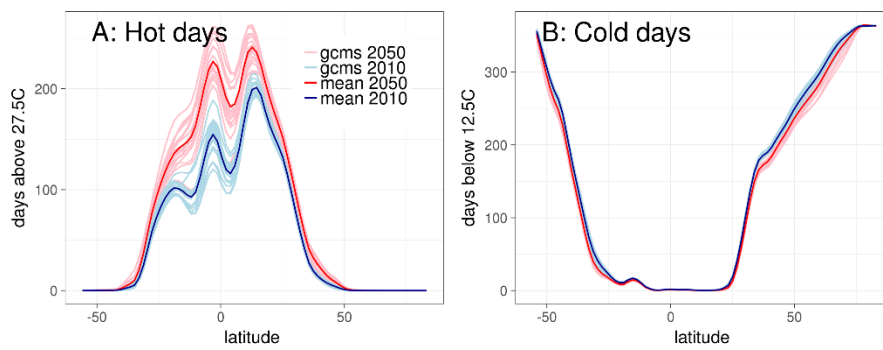

242

243

244 **Supplementary Figure 7**

245 Total energy demand exposed to changes in cold and hot days under RCP4.5 (bottom) and  
246 RCP8.5 (top). In the detailed panels (A, B, E, F) the blue lines depict present-day energy  
247 demand, and the red lines depict SSP5 baseline energy demand, brown lines indicate energy use  
248 under SSP5 after impacts of climate change (mean and all 21 ESMs) exposed to certain changes  
249 in hot and cold days. Aggregate panels (C, D, G, H) show the multi-ESM mean for all five SSPs.  
250 Impacts from climate change are shown for combined changes in hot and cold days.

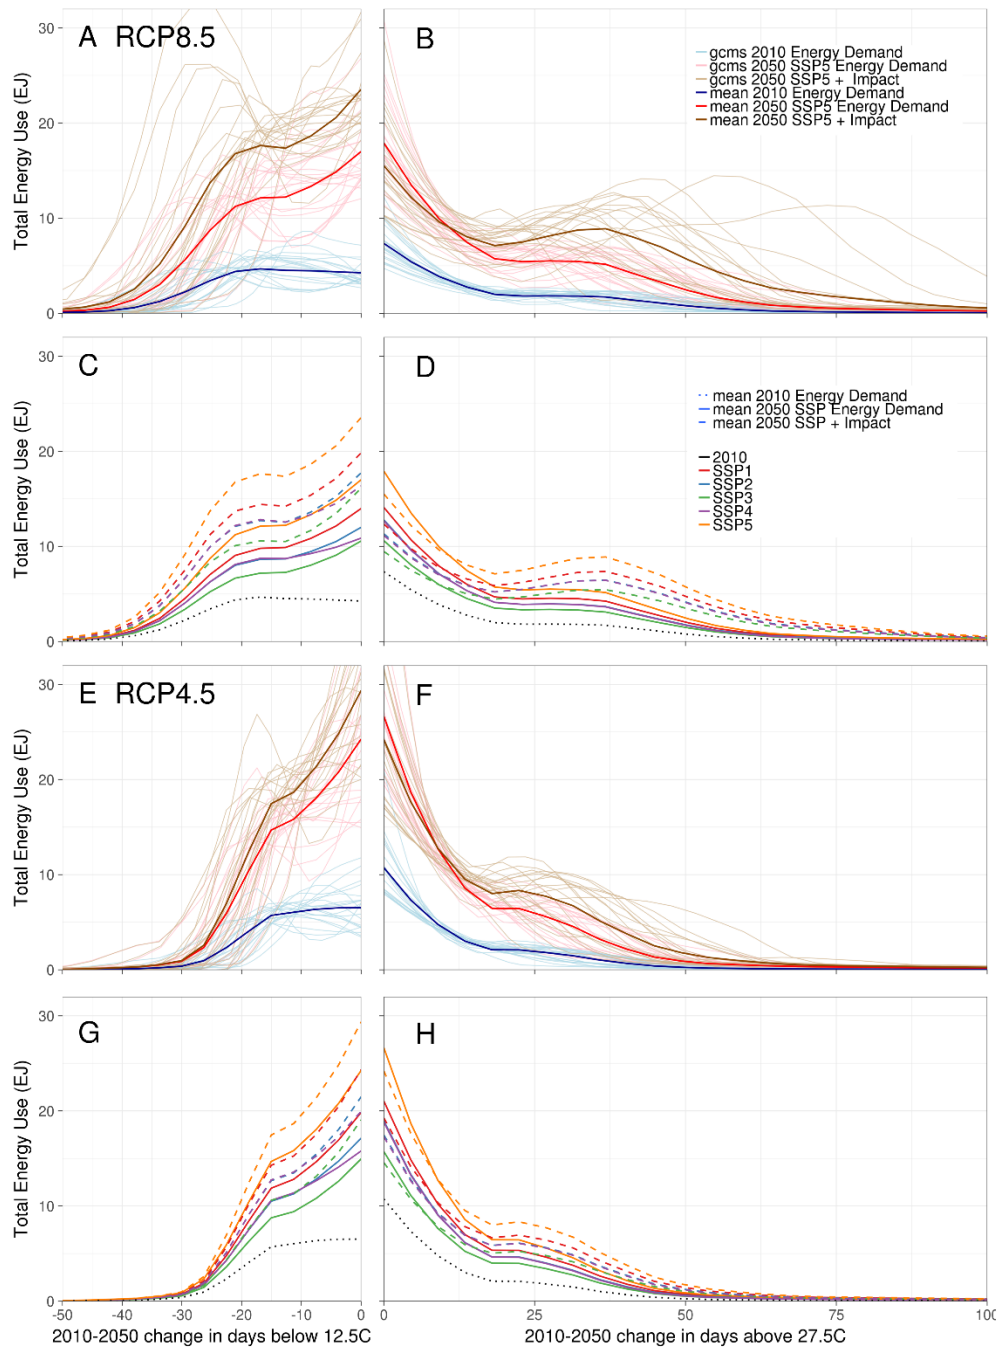

251

252

253 **Supplementary Figure 8**

254 Fuel  $\times$  sector contributions to global total energy demand amplification due to climate change  
255 around 2050, under RCP4.5 and across SSPs. Solid bars represent the median of 21 ESM model  
256 simulations, error bars represent the interquartile range of change in energy demand across 21  
257 ESM simulations.

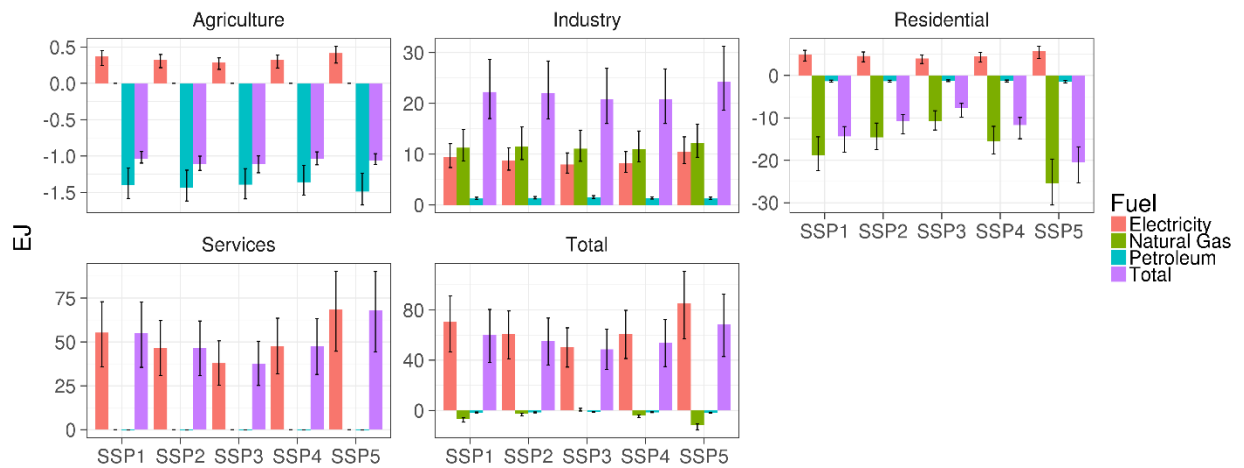

258

259

260 **Supplementary Figure 9**

261 Number of climate models that agree on total climate-related energy demand to increase or  
262 decrease by more than 0, 10, 25 or 50% by 2050 under RCP4.5 and SSP5 as result of the 21  
263 CMIP5 model ensemble of temperature projections

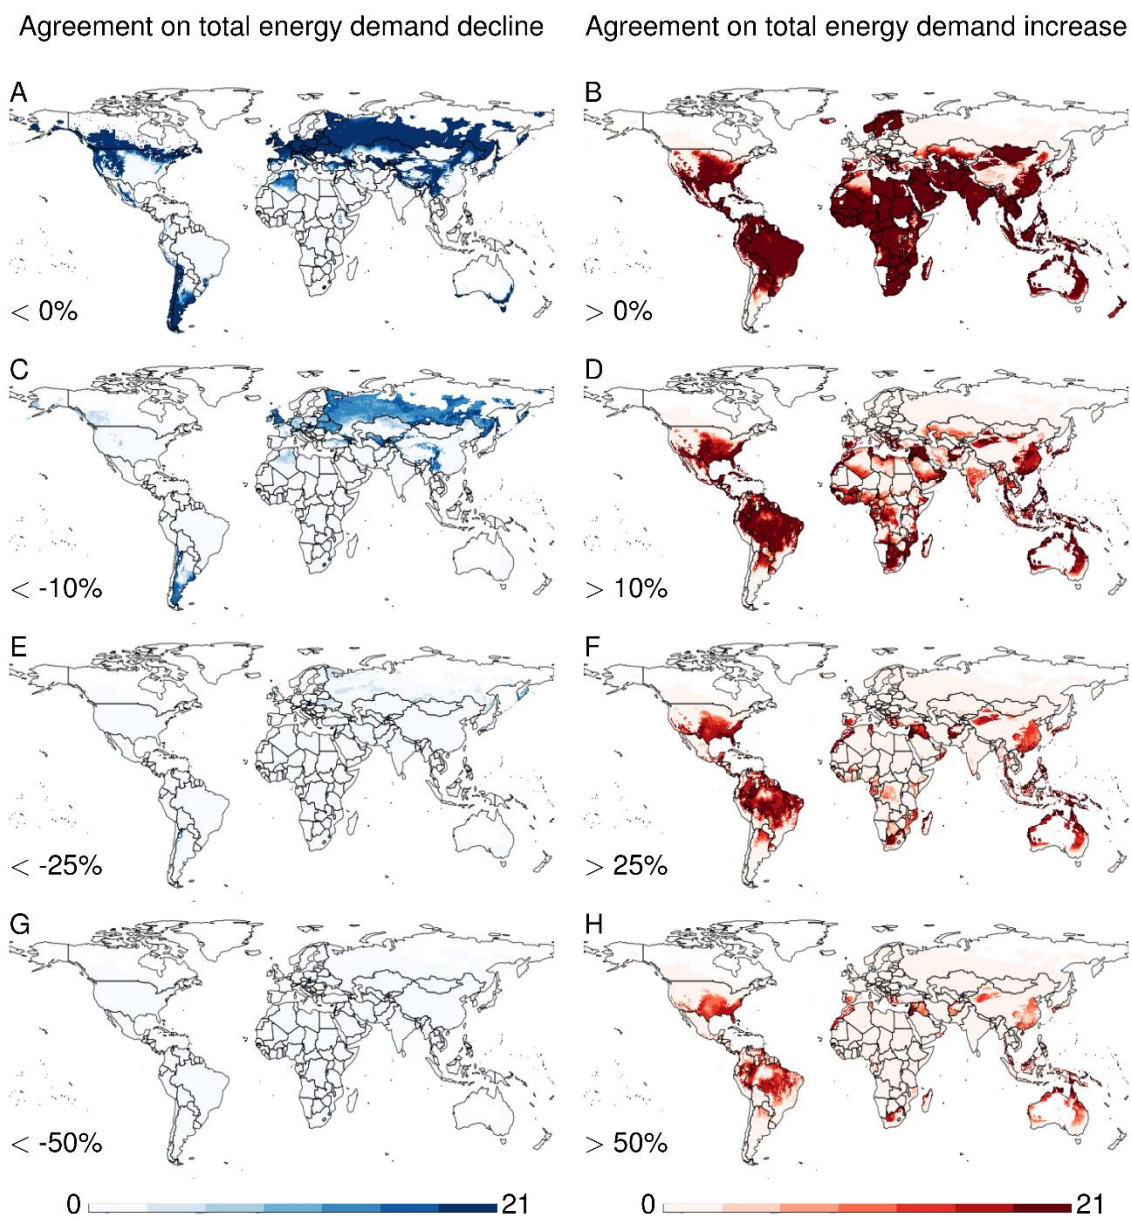

265 **Supplementary Figure 10**

266 Comparison of impacts on US electric power systems projected using econometric estimates  
267 from Auffhammer et al (2017) and De Cian and Sue Wing (2019), CCSM4 climate model.

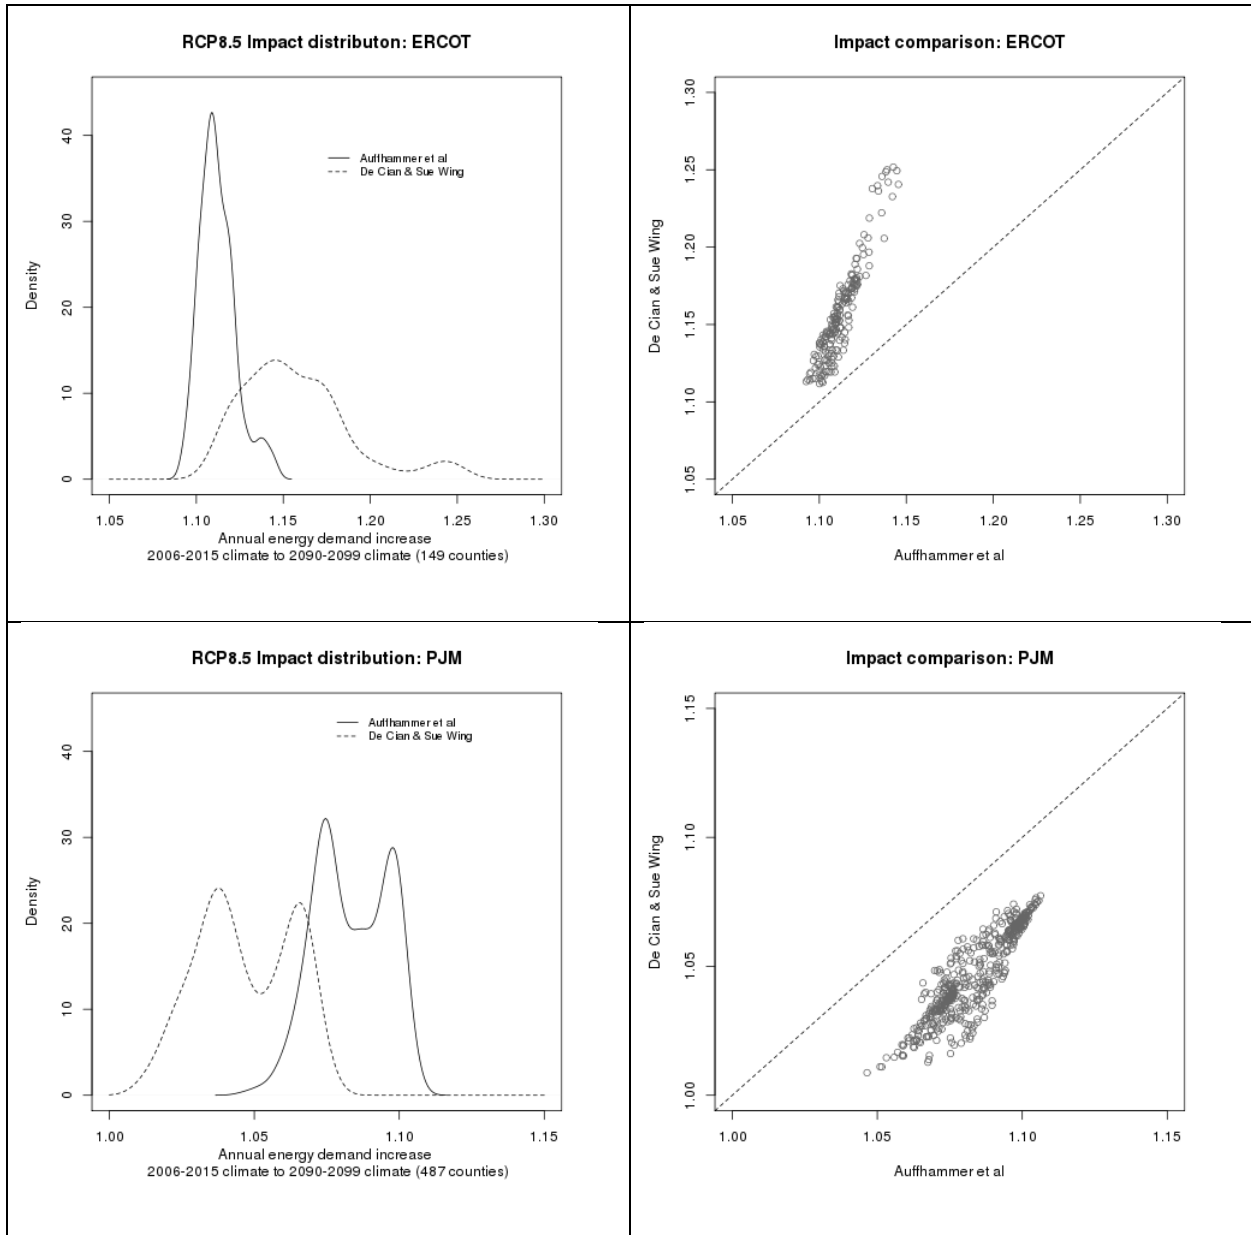

268

269 **Supplementary Table 1**

270 Absolute change in climate-related final energy demand (EJ/yr) by 2050 for all SSPs (part A)  
 271 and additional change in energy demand due to climate change under RCP8.5 (part B) and  
 272 RCP4.5 (part C). Parts B and C show the median and interquartile range across all 21 ESMs.

|                                                                                         | SSP1        | SSP2        | SSP3        | SSP4        | SSP5        |
|-----------------------------------------------------------------------------------------|-------------|-------------|-------------|-------------|-------------|
| <b>A. Change in energy demand by 2050 from 2010 (EJ)</b>                                |             |             |             |             |             |
| Europe                                                                                  | 33          | 25          | 13          | 26          | 52          |
| North America                                                                           | 31          | 26          | 16          | 28          | 49          |
| Oceania                                                                                 | 2           | 2           | 1           | 2           | 3           |
| South America                                                                           | 9           | 7           | 7           | 6           | 11          |
| Middle East & Africa                                                                    | 24          | 22          | 20          | 21          | 33          |
| Asia                                                                                    | 78          | 57          | 40          | 53          | 103         |
| World                                                                                   | 178         | 139         | 96          | 135         | 251         |
| <b>B. Additional change in energy demand due to climate change (EJ/yr) under RCP8.5</b> |             |             |             |             |             |
| Europe                                                                                  | -0.9        | -0.1        | 0.6         | -0.4        | -2.4        |
|                                                                                         | [-3.2,2.9]  | [-2.2,4.3]  | [-1.1,5.3]  | [-2.4,4.5]  | [-5.4,0.8]  |
| North America                                                                           | 42          | 39          | 32          | 39          | 52          |
|                                                                                         | [34.6,54.2] | [31.9,49.8] | [26.6,41.3] | [32.5,50.9] | [42.6,67.3] |
| Oceania                                                                                 | 1.1         | 1.0         | 0.8         | 1.0         | 1.4         |
|                                                                                         | [0.7,1.6]   | [0.7,1.4]   | [0.5,1.1]   | [0.7,1.5]   | [0.9,2]     |
| South America                                                                           | 5.5         | 5.5         | 5.7         | 5.2         | 5.8         |
|                                                                                         | [3.8,8.3]   | [3.9,8.3]   | [4.2,8.7]   | [3.6,7.9]   | [3.9,8.7]   |
| Middle East & Africa                                                                    | 15.3        | 14.9        | 13.7        | 14.5        | 18.0        |
|                                                                                         | [11.7,23.2] | [11.5,22.3] | [10.7,20.3] | [11.2,21.2] | [13.6,27.2] |
| Asia                                                                                    | 60          | 52          | 44          | 50          | 70          |
|                                                                                         | [34,87]     | [31,75]     | [27,65]     | [29,73]     | [39,101]    |
| World                                                                                   | 114         | 104         | 91          | 102         | 132         |
|                                                                                         | [84,170]    | [80,155]    | [70,136]    | [78,153]    | [98,198]    |
| <b>C. Additional change in energy demand due to climate change (EJ/yr) under RCP4.5</b> |             |             |             |             |             |
| Europe                                                                                  | -3.0        | -2.0        | -1.3        | -2.2        | -4.9        |
|                                                                                         | [-4,-2.5]   | [-3,-1.5]   | [-2.1,-0.8] | [-3.3,-1.7] | [-6.2,-4]   |
| North America                                                                           | 21          | 19          | 16          | 19          | 25          |
|                                                                                         | [14.6,30]   | [13.5,27.7] | [11.2,22.9] | [13.6,28.1] | [17.8,37]   |
| Oceania                                                                                 | 0.3         | 0.3         | 0.2         | 0.3         | 0.4         |
|                                                                                         | [0.2,0.5]   | [0.2,0.5]   | [0.2,0.4]   | [0.2,0.5]   | [0.3,0.6]   |
| South America                                                                           | 2.4         | 2.5         | 2.7         | 2.3         | 2.5         |
|                                                                                         | [2.2,3.7]   | [2.2,3.8]   | [2.4,4]     | [2.1,3.5]   | [2.3,3.9]   |
| Middle East & Africa                                                                    | 8.5         | 8.3         | 7.7         | 8.1         | 9.8         |

|              |           |           |           |           |            |
|--------------|-----------|-----------|-----------|-----------|------------|
|              | [5.7,9.4] | [5.6,9.2] | [5.2,8.6] | [5.5,9.1] | [6.6,11.1] |
| <b>Asia</b>  | 30        | 26        | 23        | 25        | 34         |
|              | [18,43]   | [17,38]   | [15,32]   | [16,37]   | [20,50]    |
| <b>World</b> | 60        | 55        | 49        | 54        | 69         |
|              | [38,80]   | [36,74]   | [33,65]   | [35,72]   | [43,93]    |



274 **Supplementary Table 2**

275 Percentage change in final energy demand as result of climate change by 2050 for all SSPs  
 276 disaggregated for changes in hot and cold days under RCP8.5. Note that each  
 277 median/interquartile range describes a different distribution of the 21 ESMs (for hot days, cold  
 278 days and total) and therefore these summarized changes in hot/cold days do not add up to the  
 279 total impacts. For each individual ESM realization, changes from hot and cold days do add up to  
 280 the total impacts, though.

281

| Region                          | Impact    | SSP1             | SSP2             | SSP3             | SSP4             | SSP5             |
|---------------------------------|-----------|------------------|------------------|------------------|------------------|------------------|
| <b>Europe</b>                   | Total     | -1% [-5%,4%]     | 0% [-4%,7%]      | 1% [-2%,11%]     | -1% [-4%,7%]     | -3% [-6%,1%]     |
|                                 | Hot days  | 11% [6%,23%]     | 11% [7%,25%]     | 12% [7%,27%]     | 12% [7%,26%]     | 10% [6%,22%]     |
|                                 | Cold days | -13% [-17%,-12%] | -12% [-16%,-12%] | -11% [-15%,-11%] | -13% [-17%,-12%] | -14% [-19%,-13%] |
| <b>North America</b>            | Total     | 64% [53%,82%]    | 64% [53%,82%]    | 63% [52%,81%]    | 63% [52%,82%]    | 63% [51%,80%]    |
|                                 | Hot days  | 70% [58%,89%]    | 70% [58%,88%]    | 69% [58%,87%]    | 70% [58%,88%]    | 69% [57%,87%]    |
|                                 | Cold days | -6% [-7%,-5%]    | -6% [-7%,-5%]    | -6% [-7%,-5%]    | -6% [-7%,-6%]    | -7% [-8%,-6%]    |
| <b>Oceania</b>                  | Total     | 28% [19%,41%]    | 28% [19%,41%]    | 29% [19%,41%]    | 28% [19%,41%]    | 28% [18%,41%]    |
|                                 | Hot days  | 32% [22%,44%]    | 32% [22%,44%]    | 32% [21%,44%]    | 32% [22%,45%]    | 32% [22%,45%]    |
|                                 | Cold days | -4% [-4%,-3%]    | -3% [-3%,-3%]    | -3% [-3%,-3%]    | -3% [-3%,-3%]    | -4% [-4%,-4%]    |
| <b>South America</b>            | Total     | 33% [23%,50%]    | 36% [25%,55%]    | 39% [29%,60%]    | 37% [26%,56%]    | 30% [20%,46%]    |
|                                 | Hot days  | 37% [27%,54%]    | 40% [30%,58%]    | 42% [32%,63%]    | 41% [30%,60%]    | 35% [26%,51%]    |
|                                 | Cold days | -4% [-5%,-4%]    | -4% [-4%,-3%]    | -3% [-3%,-3%]    | -4% [-4%,-3%]    | -5% [-5%,-4%]    |
| <b>Middle East &amp; Africa</b> | Total     | 37% [29%,57%]    | 39% [30%,58%]    | 38% [30%,56%]    | 39% [30%,57%]    | 37% [28%,55%]    |
|                                 | Hot days  | 40% [31%,60%]    | 41% [32%,61%]    | 40% [32%,59%]    | 41% [32%,60%]    | 39% [30%,58%]    |
|                                 | Cold days | -2% [-3%,-2%]    | -2% [-3%,-2%]    | -2% [-2%,-2%]    | -2% [-3%,-2%]    | -2% [-3%,-2%]    |
| <b>Asia</b>                     | Total     | 50% [28%,72%]    | 52% [31%,76%]    | 54% [33%,79%]    | 52% [31%,77%]    | 48% [27%,70%]    |
|                                 | Hot days  | 55% [34%,80%]    | 57% [35%,83%]    | 58% [37%,84%]    | 58% [36%,84%]    | 54% [33%,78%]    |
|                                 | Cold days | -7% [-8%,-6%]    | -6% [-6%,-5%]    | -5% [-5%,-4%]    | -6% [-7%,-6%]    | -7% [-8%,-6%]    |
| <b>World</b>                    | Total     | 36% [27%,54%]    | 37% [29%,56%]    | 39% [30%,58%]    | 37% [28%,56%]    | 34% [25%,51%]    |
|                                 | Hot days  | 44% [32%,61%]    | 44% [34%,62%]    | 45% [35%,64%]    | 44% [34%,63%]    | 42% [31%,59%]    |
|                                 | Cold days | -7% [-9%,-6%]    | -7% [-8%,-6%]    | -6% [-7%,-5%]    | -7% [-8%,-6%]    | -8% [-10%,-7%]   |

282

283

284 **Supplementary Table 3**

285 Percentage change in final energy demand as result of climate change by 2050 for all SSPs  
 286 disaggregated for changes in hot and cold days under RCP4.5. Note that each  
 287 median/interquartile range describes a different distribution of the 21 ESMs (for hot days, cold  
 288 days and total) and therefore these summarized changes in hot/cold days do not add up to the  
 289 total impacts. For each individual ESM, changes from hot and cold days do add up to the total  
 290 impacts, though.

| Region                          | Impact    | SSP1            | SSP2           | SSP3           | SSP4            | SSP5            |
|---------------------------------|-----------|-----------------|----------------|----------------|-----------------|-----------------|
| <b>Europe</b>                   | Total     | -4% [-6%,-4%]   | -3% [-5%,-3%]  | -3% [-4%,-2%]  | -4% [-5%,-3%]   | -6% [-7%,-5%]   |
|                                 | Hot days  | 4% [3%,7%]      | 4% [3%,7%]     | 4% [3%,8%]     | 4% [3%,7%]      | 4% [2%,6%]      |
|                                 | Cold days | -10% [-12%,-7%] | -9% [-11%,-7%] | -9% [-10%,-6%] | -10% [-11%,-7%] | -11% [-12%,-8%] |
| <b>North America</b>            | Total     | 31% [22%,46%]   | 31% [22%,46%]  | 31% [22%,45%]  | 31% [22%,45%]   | 30% [21%,44%]   |
|                                 | Hot days  | 37% [27%,51%]   | 37% [27%,51%]  | 36% [26%,50%]  | 36% [26%,51%]   | 36% [26%,50%]   |
|                                 | Cold days | -5% [-6%,-4%]   | -4% [-5%,-4%]  | -4% [-5%,-4%]  | -5% [-6%,-4%]   | -5% [-6%,-5%]   |
| <b>Oceania</b>                  | Total     | 8% [6%,13%]     | 9% [6%,13%]    | 9% [7%,14%]    | 8% [6%,13%]     | 8% [5%,13%]     |
|                                 | Hot days  | 11% [9%,16%]    | 11% [9%,16%]   | 11% [9%,16%]   | 11% [9%,16%]    | 11% [9%,16%]    |
|                                 | Cold days | -3% [-3%,-3%]   | -2% [-3%,-2%]  | -2% [-2%,-2%]  | -3% [-3%,-3%]   | -3% [-4%,-3%]   |
| <b>South America</b>            | Total     | 15% [13%,23%]   | 16% [15%,25%]  | 19% [16%,28%]  | 17% [15%,25%]   | 13% [12%,20%]   |
|                                 | Hot days  | 18% [16%,26%]   | 20% [17%,28%]  | 21% [18%,30%]  | 20% [17%,28%]   | 17% [15%,24%]   |
|                                 | Cold days | -3% [-4%,-2%]   | -3% [-3%,-2%]  | -2% [-3%,-2%]  | -3% [-3%,-2%]   | -4% [-4%,-3%]   |
| <b>Middle East &amp; Africa</b> | Total     | 21% [14%,23%]   | 22% [15%,24%]  | 21% [15%,24%]  | 22% [15%,24%]   | 20% [13%,22%]   |
|                                 | Hot days  | 23% [16%,25%]   | 23% [16%,26%]  | 23% [16%,25%]  | 23% [16%,26%]   | 22% [15%,24%]   |
|                                 | Cold days | -2% [-2%,-1%]   | -2% [-2%,-1%]  | -2% [-2%,-1%]  | -2% [-2%,-1%]   | -2% [-2%,-1%]   |
| <b>Asia</b>                     | Total     | 25% [15%,36%]   | 26% [17%,38%]  | 28% [18%,39%]  | 26% [17%,39%]   | 23% [14%,34%]   |
|                                 | Hot days  | 30% [20%,42%]   | 31% [21%,43%]  | 32% [22%,43%]  | 32% [21%,44%]   | 29% [19%,41%]   |
|                                 | Cold days | -5% [-6%,-4%]   | -4% [-5%,-4%]  | -4% [-4%,-3%]  | -5% [-6%,-4%]   | -5% [-7%,-5%]   |
| <b>World</b>                    | Total     | 19% [12%,25%]   | 20% [13%,27%]  | 21% [14%,28%]  | 20% [13%,27%]   | 18% [11%,24%]   |
|                                 | Hot days  | 25% [17%,32%]   | 25% [17%,33%]  | 25% [18%,33%]  | 25% [18%,33%]   | 24% [16%,31%]   |
|                                 | Cold days | -6% [-7%,-4%]   | -5% [-6%,-4%]  | -4% [-5%,-3%]  | -5% [-6%,-4%]   | -6% [-7%,-5%]   |

291

292

293 **Supplementary Table 4**

294 Number of people (in millions) in developing regions exposed to increases in total energy demand of 25-50% and >50% under

295 RCP8.5. Numbers indicate the median and interquartile ranges of the distribution over 21 ESMs. Countries are characterized by

296 “adaptation challenge” based on current cutoff-levels of the World Bank for lower middle, upper middle and high income countries.

|                                 |                            |        | SSP1          | SSP2          | SSP3          | SSP4          | SSP5          |
|---------------------------------|----------------------------|--------|---------------|---------------|---------------|---------------|---------------|
| <b>South America</b>            | High adaptation challenge  | 25-50% |               |               | 1% [1%,2%]    | 1% [0%,2%]    |               |
|                                 |                            | >50%   |               |               | 1% [0%,1%]    | 1% [0%,2%]    |               |
|                                 | Moderate adaptation chall. | 25-50% | 1% [1%,2%]    | 3% [3%,4%]    | 11% [10%,12%] | 4% [3%,4%]    | 1% [0%,1%]    |
|                                 |                            | >50%   | 1% [1%,1%]    | 2% [2%,4%]    | 19% [17%,25%] | 3% [3%,5%]    | 0% [0%,1%]    |
|                                 | Low adaptation challenge   | 25-50% | 13% [12%,14%] | 11% [10%,12%] | 2% [2%,3%]    | 10% [9%,10%]  | 13% [12%,14%] |
|                                 |                            | >50%   | 22% [18%,28%] | 21% [18%,27%] | 6% [5%,7%]    | 19% [17%,26%] | 21% [17%,28%] |
| <b>Middle East &amp; Africa</b> | High adaptation challenge  | 25-50% | 0% [0%,0%]    | 6% [6%,6%]    | 16% [14%,18%] | 16% [13%,19%] | 0% [0%,0%]    |
|                                 |                            | >50%   | 0% [0%,0%]    | 5% [3%,9%]    | 11% [8%,22%]  | 12% [9%,24%]  |               |
|                                 | Moderate adaptation chall. | 25-50% | 15% [14%,19%] | 13% [12%,14%] | 4% [3%,5%]    | 3% [1%,4%]    | 6% [6%,8%]    |
|                                 |                            | >50%   | 6% [4%,13%]   | 6% [3%,12%]   | 5% [3%,8%]    | 4% [3%,7%]    | 2% [1%,6%]    |
|                                 | Low adaptation challenge   | 25-50% | 4% [3%,5%]    | 3% [2%,4%]    | 2% [2%,2%]    | 2% [2%,3%]    | 10% [9%,15%]  |
|                                 |                            | >50%   | 6% [5%,9%]    | 5% [4%,7%]    | 3% [2%,4%]    | 4% [3%,5%]    | 9% [6%,13%]   |
| <b>Asia</b>                     | High adaptation challenge  | 25-50% |               | 0% [0%,0%]    | 1% [1%,2%]    | 1% [1%,2%]    |               |
|                                 |                            | >50%   |               | 1% [1%,1%]    | 1% [1%,2%]    | 1% [1%,2%]    |               |
|                                 | Moderate adaptation chall. | 25-50% | 1% [1%,2%]    | 8% [6%,10%]   | 10% [8%,11%]  | 7% [5%,9%]    | 0% [0%,1%]    |
|                                 |                            | >50%   | 3% [2%,4%]    | 4% [3%,6%]    | 8% [6%,10%]   | 4% [4%,6%]    | 1% [1%,1%]    |
|                                 | Low adaptation challenge   | 25-50% | 12% [10%,14%] | 5% [4%,13%]   | 4% [2%,10%]   | 5% [4%,13%]   | 12% [10%,16%] |
|                                 |                            | >50%   | 26% [15%,31%] | 24% [14%,29%] | 20% [11%,23%] | 24% [14%,28%] | 28% [15%,34%] |

297

298 **Supplementary Table 5**

299 Share of population in developing regions exposed to increases in total energy demand of 25-50% and larger than 50%. Numbers  
 300 indicate the median and interquartile range of the distribution over 21 ESMs. Countries are characterized by “adaptation challenge”  
 301 based on present-day cutoff-levels of World Bank definition for lower middle, upper middle and high income countries.

|                                 |                            |        | SSP1            | SSP2            | SSP3            | SSP4            | SSP5            |
|---------------------------------|----------------------------|--------|-----------------|-----------------|-----------------|-----------------|-----------------|
| <b>South America</b>            | High adaptation challenge  | 25-50% |                 |                 | 8 [4,10]        | 8 [3,10]        |                 |
|                                 |                            | >50%   |                 |                 | 5 [1,10]        | 4 [1,9]         |                 |
|                                 | Moderate adaptation chall. | 25-50% | 7 [4,9]         | 20 [18,23]      | 75 [71,81]      | 22 [19,25]      | 6 [2,8]         |
|                                 |                            | >50%   | 4 [3,6]         | 14 [10,24]      | 131 [113,168]   | 19 [15,28]      | 2 [0,3]         |
|                                 | Low adaptation challenge   | 25-50% | 72 [65,75]      | 66 [58,69]      | 14 [13,17]      | 55 [50,58]      | 68 [62,74]      |
|                                 |                            | >50%   | 117 [97,153]    | 125 [108,161]   | 39 [31,50]      | 112 [98,146]    | 111 [90,148]    |
| <b>Middle East &amp; Africa</b> | High adaptation challenge  | 25-50% | 2 [1,2]         | 147 [139,157]   | 452 [391,512]   | 446 [353,511]   | 1 [1,2]         |
|                                 |                            | >50%   | 0 [0,0]         | 117 [86,211]    | 326 [243,633]   | 341 [261,660]   |                 |
|                                 | Moderate adaptation chall. | 25-50% | 327 [306,419]   | 323 [302,343]   | 126 [93,148]    | 71 [31,100]     | 139 [134,177]   |
|                                 |                            | >50%   | 129 [89,283]    | 142 [67,310]    | 132 [88,225]    | 123 [75,181]    | 51 [31,122]     |
|                                 | Low adaptation challenge   | 25-50% | 92 [71,102]     | 71 [59,87]      | 56 [48,66]      | 67 [54,76]      | 209 [187,335]   |
|                                 |                            | >50%   | 134 [101,201]   | 133 [101,174]   | 81 [62,119]     | 97 [72,135]     | 193 [133,277]   |
| <b>Asia</b>                     | High adaptation challenge  | 25-50% |                 | 7 [5,10]        | 67 [54,109]     | 61 [49,92]      |                 |
|                                 |                            | >50%   |                 | 38 [30,41]      | 66 [47,80]      | 61 [45,75]      |                 |
|                                 | Moderate adaptation chall. | 25-50% | 56 [48,90]      | 368 [279,483]   | 487 [405,546]   | 291 [239,393]   | 17 [13,23]      |
|                                 |                            | >50%   | 127 [81,154]    | 190 [160,279]   | 402 [325,522]   | 193 [174,275]   | 31 [26,36]      |
|                                 | Low adaptation challenge   | 25-50% | 501 [428,596]   | 243 [169,589]   | 196 [113,526]   | 230 [157,561]   | 502 [433,671]   |
|                                 |                            | >50%   | 1114 [652,1348] | 1123 [666,1324] | 1040 [557,1192] | 1062 [621,1238] | 1172 [641,1429] |

302

### Supplementary Table 6

Temperature and load control points, and degree day demand responses from ABH Fig. 1

|       | °C    |       |       |       | MW    |       |       |       | MW/°C      |            |            |            |
|-------|-------|-------|-------|-------|-------|-------|-------|-------|------------|------------|------------|------------|
|       | $T_L$ | $T_C$ | $T_W$ | $T_H$ | $V_L$ | $V_C$ | $V_W$ | $V_H$ | $\delta_L$ | $\delta_C$ | $\delta_W$ | $\delta_H$ |
| ERCOT | -1    | 12.5  | 21    | 27.5  | 13000 | 1000  | 5000  | 18000 | 489        | 400        | 1667       | 333        |
| PJM   | -8    | 12.5  | 21    | 27.5  | 25000 | 0     | 9000  | 33000 | 1220       | 0          | 3000       | 692        |

## Supplementary Table 7

Comparison between DCSW elasticities and those estimated following equations S3 and

S4.

| (1)<br>Sector       | (2)<br>De Cian & Sue Wing (2019)<br>static estimates for<br>temperate climate |               | (3)<br>Reconciliation |                 |                       |                       | (4)<br>EIA SEDS<br>Share of<br>Electricity Sales |       |
|---------------------|-------------------------------------------------------------------------------|---------------|-----------------------|-----------------|-----------------------|-----------------------|--------------------------------------------------|-------|
|                     | $\beta_{s,L}$                                                                 | $\beta_{s,H}$ | $\bar{\beta}_L$       | $\bar{\beta}_H$ | $\underline{\beta}_L$ | $\underline{\beta}_H$ | PJM                                              | ERCOT |
| Residential         | n.d.                                                                          | 0.010251‡     |                       |                 |                       |                       | 0.28                                             | 0.37  |
| Commercial          | 0.0004681                                                                     | 0.0102889     |                       |                 |                       |                       | 0.57                                             | 0.34  |
| Industrial          | n.d.                                                                          | 0.003327†     |                       |                 |                       |                       | 0.13                                             | 0.28  |
| Weighted<br>Average | 0.000167                                                                      | 0.008349      | 0.002016*             | 0.002696*       | 0.002017*             | 0.002724*             |                                                  |       |

n.d. Covariate dropped from regression,

\* Significant at the 5% level, † Significant at the 10% level, ‡ Significant at the 15% level
